# Supplementary material for: Association between Reproductive Factors and Type 2 Diabetes: A Cross-Sectional Study
Source: MDPI journal article supplement (doi:10.3390/ijerph19021019), 2022-01-17
Supplement: s1 [file s1]

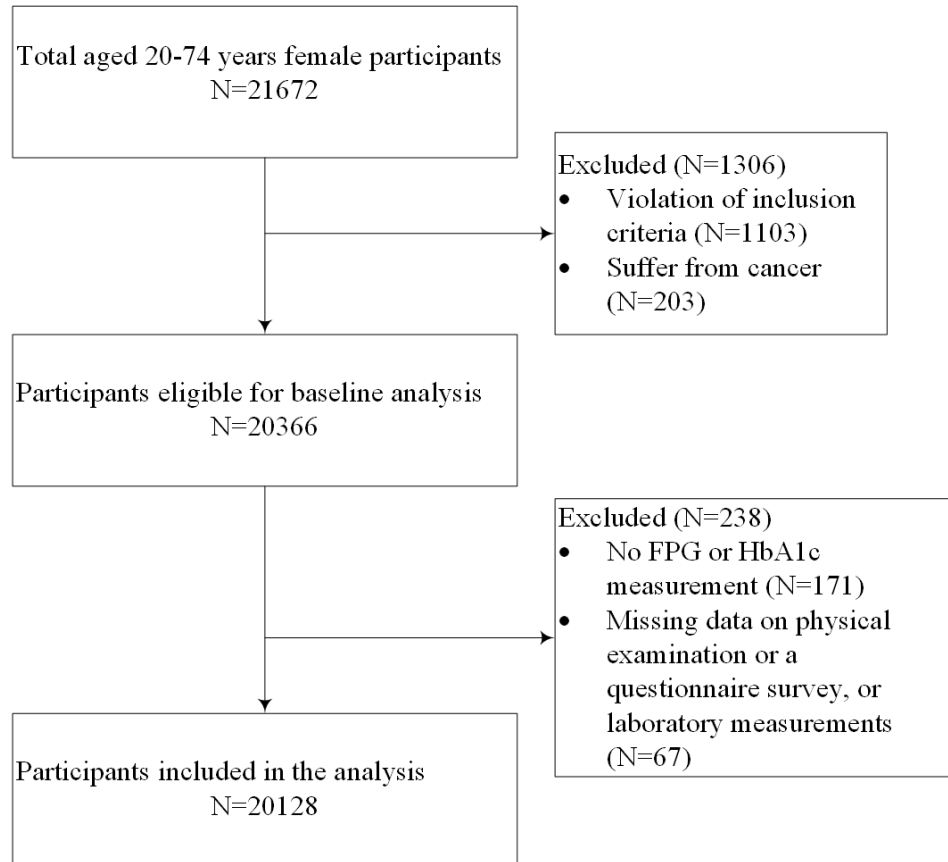

**Figure S1.** Flowchart of the study population

**Table S1.** Characteristics of the women among menopausal status ( $n = 20,128$ )

| Characteristics            | Menopausal status  |                          |                                          | <i>P</i> |
|----------------------------|--------------------|--------------------------|------------------------------------------|----------|
|                            | Pre-menopause      | Postmenopausal (natural) | Postmenopausal (surgical or other cause) |          |
|                            | ( <i>n</i> = 5775) | ( <i>n</i> = 13,463)     | ( <i>n</i> = 890)                        |          |
| Age                        |                    |                          |                                          | <0.001   |
| ≤55                        | 5650 (97.8%)       | 3388 (25.2%)             | 377 (42.4%)                              |          |
| 56-60                      | 101 (1.7%)         | 3062 (22.7%)             | 239 (26.9%)                              |          |
| 61-65                      | 24 (0.4%)          | 3321 (24.7%)             | 168 (18.9%)                              |          |
| >65                        | 0 (0.0%)           | 3692 (27.4%)             | 106 (11.9%)                              |          |
| Marital status             |                    |                          |                                          | <0.001   |
| Married                    | 5423 (93.9%)       | 12195 (90.6%)            | 823 (92.5%)                              |          |
| Unmarried/Divorced/Widowed | 352 (6.1%)         | 1268 (9.4%)              | 67 (7.5%)                                |          |
| Pregnancies (times)        |                    |                          |                                          | <0.001   |
| 0                          | 253 (4.4%)         | 64 (0.5%)                | 4 (0.4%)                                 |          |
| 1                          | 1704 (29.5%)       | 2097 (15.6%)             | 161 (18.1%)                              |          |
| 2                          | 2085 (36.1%)       | 5495 (40.8%)             | 349 (39.2%)                              |          |
| ≥3                         | 1733 (30.0%)       | 5807 (43.1%)             | 376 (42.2%)                              |          |
| Age at menarche (years)    |                    |                          |                                          | <0.001   |
| ≤15                        | 3980 (68.9%)       | 4715 (35.0%)             | 371 (41.7%)                              |          |

|                                      |              |               |             |        |
|--------------------------------------|--------------|---------------|-------------|--------|
| 16-18                                | 1709 (29.6%) | 6946 (51.6%)  | 443 (49.8%) |        |
| >18                                  | 86 (1.5%)    | 1802 (13.4%)  | 76 (8.5%)   |        |
| Reproductive period (years)          |              |               |             | <0.001 |
| 17-31                                | NA           | 3030 (22.5%)  | 542 (60.9%) |        |
| 32-34                                | NA           | 3413 (25.4%)  | 168 (18.9%) |        |
| 35-36                                | NA           | 3487 (25.9%)  | 113 (12.7%) |        |
| 37-47                                | NA           | 3533 (26.2%)  | 67 (7.5%)   |        |
| Education                            |              |               |             | <0.001 |
| Primary or below                     | 932 (16.1%)  | 8835 (65.6%)  | 507 (57.0%) |        |
| Secondary or vocational              | 3606 (62.4%) | 4564 (33.9%)  | 373 (41.9%) |        |
| University or college                | 1237 (21.4%) | 64 (0.5%)     | 10 (1.1%)   |        |
| Body mass index (kg/m <sup>2</sup> ) |              |               |             | <0.001 |
| <24                                  | 3743 (64.8%) | 6203 (46.1%)  | 384 (43.1%) |        |
| 24-27.9                              | 1515 (26.2%) | 5357 (39.8%)  | 373 (41.9%) |        |
| ≥28                                  | 517 (9.0%)   | 1903 (14.1%)  | 133 (14.9%) |        |
| Smoking                              |              |               |             | 0.044  |
| Never                                | 5750 (99.6%) | 13437 (99.8%) | 888 (99.8%) |        |
| Former                               | 6 (0.1%)     | 5 (<1%)       | 1 (0.1%)    |        |
| Current                              | 19 (0.3%)    | 21 (0.2%)     | 1 (0.1%)    |        |
| Alcohol                              |              |               |             | 0.016  |
| No                                   | 5719 (99.0%) | 13377 (99.4%) | 887 (99.7%) |        |
| Yes                                  | 56 (1.0%)    | 86 (0.6%)     | 3 (0.3%)    |        |
| Exercise                             |              |               |             | 0.020  |
| No                                   | 3854 (66.7%) | 9260 (68.8%)  | 612 (68.8%) |        |
| Yes                                  | 1921 (33.3%) | 4203 (31.2%)  | 278 (31.2%) |        |
| T2DM                                 | 231 (4.0%)   | 2361 (17.5%)  | 160 (18.0%) | <0.001 |
| Family history of T2DM               | 765 (13.2%)  | 1628 (12.1%)  | 162 (18.2%) | <0.001 |
| Hypertension                         | 1395 (24.2%) | 8030 (59.6%)  | 495 (55.6%) | <0.001 |
| Hyperlipidemia                       | 793 (13.7%)  | 3908 (29.0%)  | 253 (28.4%) | <0.001 |

The data are presented as n (%). T2DM: type 2 diabetes mellitus. P-values for differences between groups were obtained from Chi-square tests of frequencies in the respective characteristic among menopausal status.
